# Supplementary material for: Activation of the c-Met Pathway Mobilizes an Inflammatory Network in the Brain Microenvironment to Promote Brain Metastasis of Breast Cancer
Source: Oxford University Press journal article supplement (doi:10.1158/0008-5472.can-15-3541), 2016-06-30
Supplement: 00085472can153541-sup-160234_2_supp_3539008_y8pyll.docx [file 00085472can153541-sup-160234_2_supp_3539008_y8pyll.docx]

**Supplementary Tables**

**Supplementary Table S1: Pathways that used in GSEA**

| ABL1 | CREBBP | FOXP1 | NFKB1-1 | TP53 |
| --- | --- | --- | --- | --- |
| AKT1 | CTNNB1 | GATA3 | NMI | YAP |
| ARHGEF | CTNNB1 | HDAC3 | PAX3 |  |
| ATR | cyclin D1 | HDAC5 | PCNA |  |
| BCL2 | E2F1 | HIF1A | PIAS |  |
| BCL6 | E2F3 | HOXB7 | POLR2A |  |
| BRCA | E2F5 | HSF2 | RAF |  |
| BRCA1 | EGFR | ID1 | RB1 |  |
| BRCA2 | EIF4E | JUN | RBL2 |  |
| CCL5 | ERBB2 | JUND | RELA |  |
| CCNA2 | ERBB2 | KRAS | SKP2 |  |
| CCND3 | ERF | MAPK1 | SLC2A3 |  |
| CCNG2 | ESR1 | MAPK14 | SMAD7 |  |
| CDK2 | ESR1 | MAX | SP100 |  |
| CDK4 | ESRRA | MCM2 | SRC |  |
| CDKN2A | FOS | MEK | STAT1 |  |
| CEBPA | FOX01A | MET | STAT5B |  |
| CEBPB | FOX03A | MYBL2 | TCEA1 |  |
| CEBPD | FOXC1 | MYC | TEL2 |  |
| CHEK1 | FOXJ2 | NCOR2 | TOP2A |  |
|  |  |  |  |  |

**Supplementary Table S2: Clinical information of the 715 breast cancer patients.**

| | Order in Array | | --- | | Cohort | Patient ID | Metastasis free-survival (months) | All relapses (1=yes, 0=no) | Brain relapses (1=yes, 0=no) | Lung relapses (1=yes, 0=no) | Bone relapses (1=yes, 0=no) |
| --- | --- | --- | --- | --- | --- | --- | --- | --- |
| GSM352133 | GSE14020 | B22-Met | 29 | 1 | 0 | 1 | 0 |
| GSM352134 | GSE14020 | B34-Met | 68 | 1 | 0 | 1 | 0 |
| GSM352135 | GSE14020 | B35-Met | 58 | 1 | 0 | 1 | 0 |
| GSM352136 | GSE14020 | B41-Met | 19 | 1 | 0 | 0 | 0 |
| GSM352137 | GSE14020 | 100184 | 116 | 1 | 1 | 0 | 0 |
| GSM352138 | GSE14020 | 101258 | 171 | 1 | 0 | 1 | 0 |
| GSM352139 | GSE14020 | 101815 | 0 | 1 | 0 | 0 | 0 |
| GSM352140 | GSE14020 | 102962 | 163 | 1 | 1 | 0 | 0 |
| GSM352141 | GSE14020 | 103696 | 162 | 1 | 0 | 1 | 0 |
| GSM352142 | GSE14020 | 105188 | 62 | 1 | 1 | 0 | 0 |
| GSM352143 | GSE14020 | 10519 | 57 | 1 | 0 | 1 | 0 |
| GSM352144 | GSE14020 | 105880 | 22 | 1 | 0 | 0 | 0 |
| GSM352145 | GSE14020 | 106201 | 34 | 1 | 0 | 1 | 0 |
| GSM352146 | GSE14020 | 106389 | 89 | 1 | 0 | 0 | 0 |
| GSM352147 | GSE14020 | 106570 | 3 | 1 | 0 | 1 | 0 |
| GSM352148 | GSE14020 | 107426 | 29 | 1 | 1 | 0 | 0 |
| GSM352149 | GSE14020 | 107482 | 63 | 1 | 0 | 0 | 0 |
| GSM352150 | GSE14020 | 109506 | 53 | 1 | 1 | 0 | 0 |
| GSM352151 | GSE14020 | 109594 | 111 | 1 | 0 | 0 | 0 |
| GSM352152 | GSE14020 | 109714 | 2 | 1 | 1 | 0 | 0 |
| GSM352153 | GSE14020 | 109734 | 26 | 1 | 1 | 0 | 0 |
| GSM352154 | GSE14020 | 11887 | 6 | 1 | 0 | 0 | 0 |
| GSM352155 | GSE14020 | 12367 | 23 | 1 | 0 | 0 | 0 |
| GSM352156 | GSE14020 | 12740 | NA | 1 | 0 | 1 | 0 |
| GSM352157 | GSE14020 | 12749 | 14 | 1 | 0 | 0 | 0 |
| GSM352158 | GSE14020 | 14045 | NA | 1 | 0 | 1 | 0 |
| GSM352159 | GSE14020 | 14891 | 23 | 1 | 0 | 0 | 0 |
| GSM352160 | GSE14020 | 15112 | 34 | 1 | 0 | 1 | 0 |
| GSM352161 | GSE14020 | 1813 | 17 | 1 | 0 | 1 | 0 |
| GSM352162 | GSE14020 | 3032 | 18 | 1 | 0 | 0 | 0 |
| GSM352163 | GSE14020 | 3878 | 156 | 1 | 0 | 0 | 0 |
| GSM352164 | GSE14020 | 4059 | 23 | 1 | 0 | 1 | 0 |
| GSM352165 | GSE14020 | 5381 | 114 | 1 | 0 | 1 | 0 |
| GSM352166 | GSE14020 | 6565 | 70 | 1 | 0 | 1 | 0 |
| GSM352167 | GSE14020 | 6752 | 39 | 1 | 0 | 0 | 0 |
| GSM352168 | GSE14020 | 7130 | 53 | 1 | 0 | 1 | 0 |
| GSM36777 | GSE2034 | 277 | 79 | 0 | 0 | 0 | 0 |
| GSM36778 | GSE2034 | 278 | 50 | 1 | 0 | 1 | 0 |
| GSM36779 | GSE2034 | 798 | 132 | 0 | 0 | 0 | 0 |
| GSM36780 | GSE2034 | 846 | 84 | 0 | 0 | 0 | 0 |
| GSM36781 | GSE2034 | 765 | 147 | 0 | 0 | 0 | 0 |
| GSM36782 | GSE2034 | 600 | 66 | 0 | 0 | 0 | 0 |
| GSM36783 | GSE2034 | 601 | 52 | 0 | 0 | 0 | 0 |
| GSM36784 | GSE2034 | 602 | 57 | 1 | 0 | 0 | 1 |
| GSM36785 | GSE2034 | 605 | 57 | 0 | 0 | 0 | 0 |
| GSM36786 | GSE2034 | 606 | 66 | 0 | 0 | 0 | 0 |
| GSM36787 | GSE2034 | 284 | 72 | 0 | 0 | 0 | 0 |
| GSM36788 | GSE2034 | 609 | 79 | 0 | 0 | 0 | 0 |
| GSM36789 | GSE2034 | 285 | 51 | 1 | 0 | 0 | 1 |
| GSM36790 | GSE2034 | 286 | 107 | 0 | 0 | 0 | 0 |
| GSM36791 | GSE2034 | 287 | 79 | 0 | 0 | 0 | 0 |
| GSM36792 | GSE2034 | 288 | 71 | 1 | 0 | 0 | 1 |
| GSM36793 | GSE2034 | 3 | 101 | 0 | 0 | 0 | 0 |
| GSM36794 | GSE2034 | 791 | 87 | 0 | 0 | 0 | 0 |
| GSM36795 | GSE2034 | 855 | 88 | 0 | 0 | 0 | 0 |
| GSM36796 | GSE2034 | 5 | 118 | 0 | 0 | 0 | 0 |
| GSM36797 | GSE2034 | 6 | 9 | 1 | 0 | 1 | 1 |
| GSM36798 | GSE2034 | 7 | 106 | 0 | 0 | 0 | 0 |
| GSM36799 | GSE2034 | 611 | 75 | 0 | 0 | 0 | 0 |
| GSM36800 | GSE2034 | 8 | 37 | 1 | 0 | 1 | 0 |
| GSM36801 | GSE2034 | 9 | 125 | 0 | 0 | 0 | 0 |
| GSM36802 | GSE2034 | 612 | 92 | 0 | 0 | 0 | 0 |
| GSM36803 | GSE2034 | 613 | 93 | 0 | 0 | 0 | 0 |
| GSM36804 | GSE2034 | 614 | 88 | 0 | 0 | 0 | 0 |
| GSM36805 | GSE2034 | 290 | 100 | 0 | 0 | 0 | 0 |
| GSM36806 | GSE2034 | 615 | 92 | 0 | 0 | 0 | 0 |
| GSM36807 | GSE2034 | 616 | 88 | 0 | 0 | 0 | 0 |
| GSM36808 | GSE2034 | 292 | 58 | 0 | 0 | 0 | 0 |
| GSM36809 | GSE2034 | 293 | 56 | 0 | 0 | 0 | 0 |
| GSM36810 | GSE2034 | 847 | 105 | 0 | 0 | 0 | 0 |
| GSM36811 | GSE2034 | 620 | 62 | 1 | 0 | 0 | 1 |
| GSM36812 | GSE2034 | 621 | 80 | 0 | 0 | 0 | 0 |
| GSM36813 | GSE2034 | 540 | 49 | 1 | 0 | 0 | 1 |
| GSM36814 | GSE2034 | 703 | 61 | 1 | 0 | 0 | 1 |
| GSM36815 | GSE2034 | 625 | 72 | 1 | 0 | 0 | 1 |
| GSM36816 | GSE2034 | 707 | 98 | 0 | 0 | 0 | 0 |
| GSM36817 | GSE2034 | 627 | 113 | 0 | 0 | 0 | 0 |
| GSM36818 | GSE2034 | 546 | 62 | 1 | 0 | 1 | 0 |
| GSM36819 | GSE2034 | 629 | 131 | 0 | 0 | 0 | 0 |
| GSM36820 | GSE2034 | 749 | 141 | 0 | 0 | 0 | 0 |
| GSM36821 | GSE2034 | 856 | 88 | 0 | 0 | 0 | 0 |
| GSM36822 | GSE2034 | 710 | 50 | 0 | 0 | 0 | 0 |
| GSM36823 | GSE2034 | 630 | 119 | 0 | 0 | 0 | 0 |
| GSM36824 | GSE2034 | 712 | 86 | 0 | 0 | 0 | 0 |
| GSM36825 | GSE2034 | 631 | 99 | 0 | 0 | 0 | 0 |
| GSM36826 | GSE2034 | 550 | 58 | 0 | 0 | 0 | 0 |
| GSM36827 | GSE2034 | 713 | 156 | 0 | 0 | 0 | 0 |
| GSM36828 | GSE2034 | 633 | 76 | 0 | 0 | 0 | 0 |
| GSM36829 | GSE2034 | 714 | 157 | 0 | 0 | 0 | 0 |
| GSM36830 | GSE2034 | 634 | 117 | 0 | 0 | 0 | 0 |
| GSM36831 | GSE2034 | 716 | 87 | 0 | 0 | 0 | 0 |
| GSM36832 | GSE2034 | 635 | 119 | 0 | 0 | 0 | 0 |
| GSM36833 | GSE2034 | 637 | 54 | 0 | 0 | 0 | 0 |
| GSM36834 | GSE2034 | 11 | 109 | 0 | 0 | 0 | 0 |
| GSM36835 | GSE2034 | 14 | 14 | 1 | 0 | 1 | 0 |
| GSM36836 | GSE2034 | 15 | 99 | 0 | 0 | 0 | 0 |
| GSM36837 | GSE2034 | 17 | 137 | 0 | 0 | 0 | 0 |
| GSM36838 | GSE2034 | 18 | 34 | 1 | 0 | 1 | 1 |
| GSM36839 | GSE2034 | 19 | 32 | 1 | 0 | 0 | 1 |
| GSM36840 | GSE2034 | 848 | 86 | 0 | 0 | 0 | 0 |
| GSM36841 | GSE2034 | 767 | 134 | 0 | 0 | 0 | 0 |
| GSM36842 | GSE2034 | 640 | 81 | 0 | 0 | 0 | 0 |
| GSM36843 | GSE2034 | 641 | 77 | 0 | 0 | 0 | 0 |
| GSM36844 | GSE2034 | 804 | 121 | 0 | 0 | 0 | 0 |
| GSM36845 | GSE2034 | 642 | 54 | 0 | 0 | 0 | 0 |
| GSM36846 | GSE2034 | 805 | 103 | 0 | 0 | 0 | 0 |
| GSM36847 | GSE2034 | 806 | 85 | 0 | 0 | 0 | 0 |
| GSM36848 | GSE2034 | 726 | 105 | 0 | 0 | 0 | 0 |
| GSM36849 | GSE2034 | 808 | 110 | 0 | 0 | 0 | 0 |
| GSM36850 | GSE2034 | 727 | 121 | 0 | 0 | 0 | 0 |
| GSM36851 | GSE2034 | 646 | 100 | 0 | 0 | 0 | 0 |
| GSM36852 | GSE2034 | 809 | 107 | 0 | 0 | 0 | 0 |
| GSM36853 | GSE2034 | 728 | 105 | 0 | 0 | 0 | 0 |
| GSM36854 | GSE2034 | 647 | 105 | 0 | 0 | 0 | 0 |
| GSM36855 | GSE2034 | 20 | 128 | 0 | 0 | 0 | 0 |
| GSM36856 | GSE2034 | 729 | 86 | 0 | 0 | 0 | 0 |
| GSM36857 | GSE2034 | 648 | 95 | 0 | 0 | 0 | 0 |
| GSM36858 | GSE2034 | 21 | 14 | 1 | 0 | 0 | 1 |
| GSM36859 | GSE2034 | 22 | 130 | 0 | 0 | 0 | 0 |
| GSM36860 | GSE2034 | 27 | 30 | 1 | 0 | 0 | 1 |
| GSM36861 | GSE2034 | 28 | 155 | 0 | 0 | 0 | 0 |
| GSM36862 | GSE2034 | 29 | 25 | 1 | 0 | 0 | 1 |
| GSM36863 | GSE2034 | 857 | 98 | 0 | 0 | 0 | 0 |
| GSM36864 | GSE2034 | 810 | 84 | 0 | 0 | 0 | 0 |
| GSM36865 | GSE2034 | 813 | 103 | 0 | 0 | 0 | 0 |
| GSM36866 | GSE2034 | 815 | 107 | 0 | 0 | 0 | 0 |
| GSM36867 | GSE2034 | 817 | 108 | 0 | 0 | 0 | 0 |
| GSM36868 | GSE2034 | 737 | 123 | 0 | 0 | 0 | 0 |
| GSM36869 | GSE2034 | 738 | 126 | 0 | 0 | 0 | 0 |
| GSM36870 | GSE2034 | 31 | 30 | 1 | 0 | 0 | 1 |
| GSM36871 | GSE2034 | 32 | 84 | 0 | 0 | 0 | 0 |
| GSM36872 | GSE2034 | 33 | 7 | 1 | 0 | 0 | 0 |
| GSM36873 | GSE2034 | 34 | 100 | 0 | 0 | 0 | 0 |
| GSM36874 | GSE2034 | 35 | 30 | 1 | 0 | 0 | 1 |
| GSM36875 | GSE2034 | 37 | 7 | 1 | 1 | 0 | 0 |
| GSM36876 | GSE2034 | 38 | 133 | 0 | 0 | 0 | 0 |
| GSM36877 | GSE2034 | 39 | 43 | 1 | 1 | 0 | 0 |
| GSM36878 | GSE2034 | 760 | 98 | 0 | 0 | 0 | 0 |
| GSM36879 | GSE2034 | 100 | 39 | 1 | 0 | 0 | 1 |
| GSM36880 | GSE2034 | 103 | 97 | 0 | 0 | 0 | 0 |
| GSM36881 | GSE2034 | 104 | 11 | 1 | 0 | 0 | 1 |
| GSM36882 | GSE2034 | 105 | 99 | 0 | 0 | 0 | 0 |
| GSM36883 | GSE2034 | 849 | 88 | 0 | 0 | 0 | 0 |
| GSM36884 | GSE2034 | 768 | 129 | 0 | 0 | 0 | 0 |
| GSM36885 | GSE2034 | 106 | 40 | 1 | 0 | 0 | 1 |
| GSM36886 | GSE2034 | 107 | 94 | 0 | 0 | 0 | 0 |
| GSM36887 | GSE2034 | 900 | 108 | 0 | 0 | 0 | 0 |
| GSM36888 | GSE2034 | 108 | 28 | 1 | 0 | 1 | 1 |
| GSM36889 | GSE2034 | 901 | 108 | 0 | 0 | 0 | 0 |
| GSM36890 | GSE2034 | 820 | 116 | 0 | 0 | 0 | 0 |
| GSM36891 | GSE2034 | 109 | 87 | 0 | 0 | 0 | 0 |
| GSM36892 | GSE2034 | 903 | 110 | 0 | 0 | 0 | 0 |
| GSM36893 | GSE2034 | 741 | 124 | 0 | 0 | 0 | 0 |
| GSM36894 | GSE2034 | 909 | 109 | 0 | 0 | 0 | 0 |
| GSM36895 | GSE2034 | 747 | 96 | 0 | 0 | 0 | 0 |
| GSM36896 | GSE2034 | 40 | 102 | 0 | 0 | 0 | 0 |
| GSM36897 | GSE2034 | 41 | 25 | 1 | 0 | 0 | 0 |
| GSM36898 | GSE2034 | 212 | 7 | 1 | 0 | 0 | 1 |
| GSM36899 | GSE2034 | 44 | 169 | 0 | 0 | 0 | 0 |
| GSM36900 | GSE2034 | 46 | 109 | 0 | 0 | 0 | 0 |
| GSM36901 | GSE2034 | 48 | 101 | 0 | 0 | 0 | 0 |
| GSM36902 | GSE2034 | 49 | 28 | 1 | 1 | 0 | 0 |
| GSM36903 | GSE2034 | 110 | 8 | 1 | 0 | 0 | 1 |
| GSM36904 | GSE2034 | 111 | 98 | 0 | 0 | 0 | 0 |
| GSM36905 | GSE2034 | 112 | 17 | 1 | 0 | 0 | 0 |
| GSM36906 | GSE2034 | 113 | 101 | 0 | 0 | 0 | 0 |
| GSM36907 | GSE2034 | 114 | 86 | 0 | 0 | 0 | 0 |
| GSM36908 | GSE2034 | 115 | 15 | 1 | 0 | 1 | 1 |
| GSM36909 | GSE2034 | 118 | 95 | 0 | 0 | 0 | 0 |
| GSM36910 | GSE2034 | 751 | 125 | 0 | 0 | 0 | 0 |
| GSM36911 | GSE2034 | 913 | 80 | 1 | 0 | 0 | 1 |
| GSM36912 | GSE2034 | 833 | 97 | 0 | 0 | 0 | 0 |
| GSM36913 | GSE2034 | 754 | 109 | 0 | 0 | 0 | 0 |
| GSM36914 | GSE2034 | 836 | 84 | 0 | 0 | 0 | 0 |
| GSM36915 | GSE2034 | 839 | 97 | 0 | 0 | 0 | 0 |
| GSM36916 | GSE2034 | 50 | 125 | 0 | 0 | 0 | 0 |
| GSM36917 | GSE2034 | 54 | 144 | 0 | 0 | 0 | 0 |
| GSM36918 | GSE2034 | 55 | 11 | 1 | 0 | 0 | 1 |
| GSM36919 | GSE2034 | 56 | 153 | 0 | 0 | 0 | 0 |
| GSM36920 | GSE2034 | 57 | 20 | 1 | 0 | 0 | 0 |
| GSM36921 | GSE2034 | 200 | 108 | 0 | 0 | 0 | 0 |
| GSM36922 | GSE2034 | 201 | 113 | 0 | 0 | 0 | 0 |
| GSM36923 | GSE2034 | 121 | 23 | 1 | 0 | 1 | 0 |
| GSM36924 | GSE2034 | 203 | 29 | 1 | 0 | 0 | 1 |
| GSM36925 | GSE2034 | 122 | 104 | 0 | 0 | 0 | 0 |
| GSM36926 | GSE2034 | 204 | 24 | 1 | 0 | 1 | 0 |
| GSM36927 | GSE2034 | 124 | 8 | 1 | 0 | 1 | 0 |
| GSM36928 | GSE2034 | 205 | 23 | 1 | 0 | 0 | 1 |
| GSM36929 | GSE2034 | 125 | 93 | 0 | 0 | 0 | 0 |
| GSM36930 | GSE2034 | 769 | 84 | 0 | 0 | 0 | 0 |
| GSM36931 | GSE2034 | 126 | 37 | 1 | 1 | 1 | 0 |
| GSM36932 | GSE2034 | 841 | 96 | 0 | 0 | 0 | 0 |
| GSM36933 | GSE2034 | 843 | 110 | 0 | 0 | 0 | 0 |
| GSM36934 | GSE2034 | 763 | 171 | 0 | 0 | 0 | 0 |
| GSM36935 | GSE2034 | 844 | 114 | 0 | 0 | 0 | 0 |
| GSM36936 | GSE2034 | 845 | 109 | 0 | 0 | 0 | 0 |
| GSM36937 | GSE2034 | 61 | 11 | 1 | 0 | 1 | 1 |
| GSM36938 | GSE2034 | 62 | 108 | 0 | 0 | 0 | 0 |
| GSM36939 | GSE2034 | 63 | 14 | 1 | 0 | 0 | 1 |
| GSM36940 | GSE2034 | 64 | 134 | 0 | 0 | 0 | 0 |
| GSM36941 | GSE2034 | 65 | 9 | 0 | 0 | 0 | 0 |
| GSM36942 | GSE2034 | 66 | 152 | 0 | 0 | 0 | 0 |
| GSM36943 | GSE2034 | 67 | 19 | 1 | 0 | 0 | 1 |
| GSM36944 | GSE2034 | 68 | 112 | 0 | 0 | 0 | 0 |
| GSM36945 | GSE2034 | 851 | 92 | 0 | 0 | 0 | 0 |
| GSM36946 | GSE2034 | 130 | 26 | 1 | 0 | 0 | 1 |
| GSM36947 | GSE2034 | 213 | 16 | 1 | 0 | 0 | 1 |
| GSM36948 | GSE2034 | 133 | 87 | 0 | 0 | 0 | 0 |
| GSM36949 | GSE2034 | 215 | 6 | 1 | 0 | 0 | 1 |
| GSM36950 | GSE2034 | 134 | 28 | 1 | 0 | 0 | 1 |
| GSM36951 | GSE2034 | 778 | 104 | 0 | 0 | 0 | 0 |
| GSM36952 | GSE2034 | 216 | 13 | 0 | 0 | 0 | 0 |
| GSM36953 | GSE2034 | 135 | 84 | 0 | 0 | 0 | 0 |
| GSM36954 | GSE2034 | 217 | 19 | 1 | 0 | 0 | 1 |
| GSM36955 | GSE2034 | 136 | 25 | 1 | 0 | 0 | 1 |
| GSM36956 | GSE2034 | 137 | 32 | 1 | 0 | 0 | 1 |
| GSM36957 | GSE2034 | 138 | 47 | 1 | 0 | 0 | 1 |
| GSM36958 | GSE2034 | 139 | 111 | 0 | 0 | 0 | 0 |
| GSM36959 | GSE2034 | 774 | 120 | 0 | 0 | 0 | 0 |
| GSM36960 | GSE2034 | 696 | 51 | 1 | 1 | 0 | 0 |
| GSM36961 | GSE2034 | 777 | 153 | 0 | 0 | 0 | 0 |
| GSM36962 | GSE2034 | 70 | 114 | 0 | 0 | 0 | 0 |
| GSM36963 | GSE2034 | 698 | 60 | 0 | 0 | 0 | 0 |
| GSM36964 | GSE2034 | 71 | 12 | 1 | 1 | 0 | 1 |
| GSM36965 | GSE2034 | 72 | 134 | 0 | 0 | 0 | 0 |
| GSM36966 | GSE2034 | 74 | 90 | 0 | 0 | 0 | 0 |
| GSM36967 | GSE2034 | 75 | 15 | 1 | 0 | 0 | 1 |
| GSM36968 | GSE2034 | 78 | 152 | 0 | 0 | 0 | 0 |
| GSM36969 | GSE2034 | 79 | 32 | 1 | 0 | 1 | 0 |
| GSM36970 | GSE2034 | 762 | 116 | 0 | 0 | 0 | 0 |
| GSM36971 | GSE2034 | 140 | 19 | 1 | 0 | 0 | 1 |
| GSM36972 | GSE2034 | 222 | 37 | 1 | 0 | 0 | 1 |
| GSM36973 | GSE2034 | 141 | 25 | 1 | 0 | 1 | 0 |
| GSM36974 | GSE2034 | 223 | 23 | 1 | 0 | 1 | 0 |
| GSM36975 | GSE2034 | 787 | 110 | 0 | 0 | 0 | 0 |
| GSM36976 | GSE2034 | 226 | 38 | 1 | 0 | 0 | 1 |
| GSM36977 | GSE2034 | 780 | 124 | 0 | 0 | 0 | 0 |
| GSM36978 | GSE2034 | 782 | 148 | 0 | 0 | 0 | 0 |
| GSM36979 | GSE2034 | 863 | 107 | 0 | 0 | 0 | 0 |
| GSM36980 | GSE2034 | 783 | 122 | 0 | 0 | 0 | 0 |
| GSM36981 | GSE2034 | 864 | 87 | 0 | 0 | 0 | 0 |
| GSM36982 | GSE2034 | 865 | 92 | 0 | 0 | 0 | 0 |
| GSM36983 | GSE2034 | 866 | 75 | 1 | 0 | 0 | 1 |
| GSM36984 | GSE2034 | 785 | 138 | 0 | 0 | 0 | 0 |
| GSM36985 | GSE2034 | 867 | 55 | 0 | 0 | 0 | 0 |
| GSM36986 | GSE2034 | 868 | 77 | 1 | 0 | 1 | 0 |
| GSM36987 | GSE2034 | 80 | 97 | 0 | 0 | 0 | 0 |
| GSM36988 | GSE2034 | 789 | 96 | 0 | 0 | 0 | 0 |
| GSM36989 | GSE2034 | 81 | 11 | 1 | 0 | 1 | 1 |
| GSM36990 | GSE2034 | 82 | 143 | 0 | 0 | 0 | 0 |
| GSM36991 | GSE2034 | 84 | 114 | 0 | 0 | 0 | 0 |
| GSM36992 | GSE2034 | 86 | 104 | 0 | 0 | 0 | 0 |
| GSM36993 | GSE2034 | 88 | 98 | 0 | 0 | 0 | 0 |
| GSM36994 | GSE2034 | 89 | 2 | 1 | 0 | 0 | 1 |
| GSM36995 | GSE2034 | 852 | 113 | 0 | 0 | 0 | 0 |
| GSM36996 | GSE2034 | 230 | 24 | 1 | 0 | 0 | 1 |
| GSM36997 | GSE2034 | 231 | 44 | 1 | 1 | 0 | 1 |
| GSM36998 | GSE2034 | 233 | 5 | 0 | 0 | 0 | 0 |
| GSM36999 | GSE2034 | 234 | 37 | 0 | 0 | 0 | 0 |
| GSM37000 | GSE2034 | 779 | 137 | 0 | 0 | 0 | 0 |
| GSM37001 | GSE2034 | 235 | 33 | 1 | 0 | 0 | 1 |
| GSM37002 | GSE2034 | 236 | 16 | 1 | 1 | 0 | 0 |
| GSM37003 | GSE2034 | 237 | 19 | 1 | 0 | 0 | 1 |
| GSM37004 | GSE2034 | 239 | 35 | 1 | 0 | 0 | 1 |
| GSM37005 | GSE2034 | 870 | 56 | 0 | 0 | 0 | 0 |
| GSM37006 | GSE2034 | 871 | 71 | 1 | 0 | 0 | 1 |
| GSM37007 | GSE2034 | 873 | 59 | 1 | 0 | 0 | 1 |
| GSM37008 | GSE2034 | 874 | 70 | 1 | 0 | 0 | 1 |
| GSM37009 | GSE2034 | 793 | 122 | 0 | 0 | 0 | 0 |
| GSM37010 | GSE2034 | 794 | 101 | 0 | 0 | 0 | 0 |
| GSM37011 | GSE2034 | 876 | 60 | 1 | 0 | 1 | 1 |
| GSM37012 | GSE2034 | 795 | 132 | 0 | 0 | 0 | 0 |
| GSM37013 | GSE2034 | 877 | 66 | 1 | 0 | 0 | 1 |
| GSM37014 | GSE2034 | 796 | 143 | 0 | 0 | 0 | 0 |
| GSM37015 | GSE2034 | 797 | 122 | 0 | 0 | 0 | 0 |
| GSM37016 | GSE2034 | 879 | 108 | 0 | 0 | 0 | 0 |
| GSM37017 | GSE2034 | 90 | 108 | 0 | 0 | 0 | 0 |
| GSM37018 | GSE2034 | 91 | 20 | 1 | 1 | 0 | 1 |
| GSM37019 | GSE2034 | 92 | 146 | 0 | 0 | 0 | 0 |
| GSM37020 | GSE2034 | 93 | 48 | 1 | 0 | 0 | 1 |
| GSM37021 | GSE2034 | 94 | 109 | 0 | 0 | 0 | 0 |
| GSM37022 | GSE2034 | 96 | 30 | 1 | 0 | 0 | 0 |
| GSM37023 | GSE2034 | 98 | 14 | 1 | 0 | 0 | 1 |
| GSM37024 | GSE2034 | 861 | 95 | 0 | 0 | 0 | 0 |
| GSM37025 | GSE2034 | 99 | 107 | 0 | 0 | 0 | 0 |
| GSM37026 | GSE2034 | 240 | 36 | 1 | 0 | 0 | 1 |
| GSM37027 | GSE2034 | 241 | 17 | 1 | 0 | 1 | 0 |
| GSM37028 | GSE2034 | 244 | 39 | 0 | 0 | 0 | 0 |
| GSM37029 | GSE2034 | 246 | 47 | 1 | 0 | 1 | 0 |
| GSM37030 | GSE2034 | 247 | 44 | 0 | 0 | 0 | 0 |
| GSM37031 | GSE2034 | 249 | 18 | 1 | 0 | 1 | 1 |
| GSM37032 | GSE2034 | 883 | 86 | 0 | 0 | 0 | 0 |
| GSM37033 | GSE2034 | 887 | 161 | 0 | 0 | 0 | 0 |
| GSM37034 | GSE2034 | 853 | 88 | 0 | 0 | 0 | 0 |
| GSM37035 | GSE2034 | 250 | 14 | 1 | 0 | 0 | 1 |
| GSM37036 | GSE2034 | 252 | 15 | 1 | 0 | 0 | 1 |
| GSM37037 | GSE2034 | 253 | 19 | 1 | 0 | 0 | 1 |
| GSM37038 | GSE2034 | 416 | 60 | 1 | 0 | 1 | 1 |
| GSM37039 | GSE2034 | 254 | 48 | 1 | 0 | 0 | 1 |
| GSM37040 | GSE2034 | 255 | 6 | 1 | 1 | 1 | 0 |
| GSM37041 | GSE2034 | 258 | 9 | 1 | 0 | 0 | 1 |
| GSM37042 | GSE2034 | 259 | 14 | 0 | 0 | 0 | 0 |
| GSM37043 | GSE2034 | 890 | 161 | 0 | 0 | 0 | 0 |
| GSM37044 | GSE2034 | 891 | 112 | 0 | 0 | 0 | 0 |
| GSM37045 | GSE2034 | 894 | 123 | 0 | 0 | 0 | 0 |
| GSM37046 | GSE2034 | 899 | 86 | 0 | 0 | 0 | 0 |
| GSM37047 | GSE2034 | 772 | 108 | 0 | 0 | 0 | 0 |
| GSM37048 | GSE2034 | 862 | 87 | 0 | 0 | 0 | 0 |
| GSM37049 | GSE2034 | 260 | 29 | 1 | 0 | 0 | 1 |
| GSM37050 | GSE2034 | 261 | 18 | 0 | 0 | 0 | 0 |
| GSM37051 | GSE2034 | 262 | 18 | 1 | 0 | 1 | 0 |
| GSM37052 | GSE2034 | 263 | 32 | 0 | 0 | 0 | 0 |
| GSM37053 | GSE2034 | 264 | 33 | 1 | 0 | 0 | 1 |
| GSM37054 | GSE2034 | 265 | 66 | 0 | 0 | 0 | 0 |
| GSM37055 | GSE2034 | 267 | 59 | 0 | 0 | 0 | 0 |
| GSM37056 | GSE2034 | 268 | 82 | 0 | 0 | 0 | 0 |
| GSM37057 | GSE2034 | 270 | 59 | 0 | 0 | 0 | 0 |
| GSM37058 | GSE2034 | 271 | 64 | 1 | 0 | 0 | 1 |
| GSM37059 | GSE2034 | 272 | 83 | 0 | 0 | 0 | 0 |
| GSM37060 | GSE2034 | 273 | 81 | 0 | 0 | 0 | 0 |
| GSM37061 | GSE2034 | 275 | 105 | 0 | 0 | 0 | 0 |
| GSM37062 | GSE2034 | 276 | 54 | 0 | 0 | 0 | 0 |
| GSM50034 | GSE2603 | B110.T | 87 | 0 | 0 | 0 | 0 |
| GSM50035 | GSE2603 | B114.T | 22.1 | 1 | 0 | 1 | 0 |
| GSM50036 | GSE2603 | B52.T | 109.8 | 0 | 0 | 0 | 0 |
| GSM50037 | GSE2603 | B54.T | 82.3 | 0 | 0 | 0 | 0 |
| GSM50038 | GSE2603 | B55.T | 77.6 | 0 | 0 | 0 | 0 |
| GSM50039 | GSE2603 | B56.T | 85 | 0 | 0 | 0 | 0 |
| GSM50040 | GSE2603 | B57.T | 90.8 | 0 | 0 | 0 | 0 |
| GSM50041 | #N/A | #N/A | #N/A | ## | #N/A | #### | #N/A |
| GSM50042 | GSE2603 | B61.T | 52.9 | 0 | 0 | 0 | 0 |
| GSM50043 | GSE2603 | B62.T | 62.8 | 0 | 0 | 0 | 0 |
| GSM50044 | GSE2603 | B63.T | 67.4 | 0 | 0 | 0 | 0 |
| GSM50045 | GSE2603 | B66.T | 129 | 0 | 0 | 0 | 0 |
| GSM50046 | GSE2603 | B67.T | 96.5 | 0 | 0 | 0 | 0 |
| GSM50047 | GSE2603 | B68.T | 64.9 | 0 | 0 | 0 | 0 |
| GSM50048 | GSE2603 | B69.T | 72.8 | 0 | 0 | 0 | 0 |
| GSM50049 | GSE2603 | B71.T | 66 | 0 | 0 | 0 | 0 |
| GSM50050 | #N/A | #N/A | #N/A | ## | #N/A | #### | #N/A |
| GSM50051 | GSE2603 | B74.T | 45.2 | 0 | 0 | 0 | 0 |
| GSM50052 | GSE2603 | B75.T | 54.7 | 0 | 0 | 0 | 0 |
| GSM50053 | GSE2603 | B76.T | 47.6 | 0 | 0 | 0 | 0 |
| GSM50054 | GSE2603 | B77.T | 48.6 | 0 | 0 | 0 | 0 |
| GSM50055 | #N/A | #N/A | #N/A | ## | #N/A | #### | #N/A |
| GSM50056 | #N/A | #N/A | #N/A | ## | #N/A | #### | #N/A |
| GSM50057 | #N/A | #N/A | #N/A | ## | #N/A | #### | #N/A |
| GSM50058 | #N/A | #N/A | #N/A | ## | #N/A | #### | #N/A |
| GSM50059 | GSE2603 | B42.T | 91.6 | 0 | 0 | 0 | 0 |
| GSM50060 | GSE2603 | B43.T | 41.6 | 1 | 1 | 1 | 0 |
| GSM50061 | GSE2603 | B44.T | 47.5 | 1 | 1 | 1 | 1 |
| GSM50062 | GSE2603 | B45.T | 36.8 | 0 | 0 | 0 | 0 |
| GSM50063 | GSE2603 | B46.T | 37.3 | 1 | 0 | 1 | 0 |
| GSM50064 | GSE2603 | B47.T | 11.3 | 1 | 0 | 1 | 1 |
| GSM50065 | GSE2603 | B48.T | 69.7 | 0 | 0 | 0 | 0 |
| GSM50066 | GSE2603 | B49.T | 14.9 | 1 | 0 | 1 | 1 |
| GSM50067 | GSE2603 | B50.T | 9.2 | 1 | 0 | 1 | 0 |
| GSM50068 | GSE2603 | B51.T | 41.8 | 1 | 0 | 1 | 0 |
| GSM50069 | GSE2603 | B73.T | 46 | 1 | 1 | 1 | 0 |
| GSM50070 | GSE2603 | B98.T | 40.3 | 1 | 0 | 0 | 1 |
| GSM50071 | GSE2603 | B100.T | 69.8 | 0 | 0 | 0 | 0 |
| GSM50072 | GSE2603 | B101.T | 128.9 | 0 | 0 | 0 | 0 |
| GSM50073 | GSE2603 | B102.T | 87 | 0 | 0 | 0 | 0 |
| GSM50074 | GSE2603 | B104.T | 87.8 | 0 | 0 | 0 | 0 |
| GSM50075 | GSE2603 | B105.T | 87.8 | 0 | 0 | 0 | 0 |
| GSM50076 | #N/A | #N/A | #N/A | ## | #N/A | #### | #N/A |
| GSM50077 | #N/A | #N/A | #N/A | ## | #N/A | #### | #N/A |
| GSM50078 | GSE2603 | B112.T | 83.8 | 0 | 0 | 0 | 0 |
| GSM50079 | GSE2603 | B115.T | 78.2 | 0 | 0 | 0 | 0 |
| GSM50080 | GSE2603 | B78.T | 87 | 0 | 0 | 0 | 0 |
| GSM50081 | GSE2603 | B79.T | 60.8 | 0 | 0 | 0 | 0 |
| GSM50082 | GSE2603 | B80.T | 85.3 | 0 | 0 | 0 | 0 |
| GSM50083 | GSE2603 | B82.T | 87.4 | 0 | 0 | 0 | 0 |
| GSM50084 | GSE2603 | B83.T | 76.8 | 0 | 0 | 0 | 0 |
| GSM50085 | GSE2603 | B84.T | 78 | 0 | 0 | 0 | 0 |
| GSM50086 | GSE2603 | B85.T | 99.7 | 0 | 0 | 0 | 0 |
| GSM50087 | GSE2603 | B86.T | 99.7 | 0 | 0 | 0 | 0 |
| GSM50088 | #N/A | #N/A | #N/A | ## | #N/A | #### | #N/A |
| GSM50089 | GSE2603 | B89.T | 104.9 | 0 | 0 | 0 | 0 |
| GSM50090 | GSE2603 | B90.T | 81.5 | 0 | 0 | 0 | 0 |
| GSM50091 | GSE2603 | B91.T | 86.3 | 0 | 0 | 0 | 0 |
| GSM50092 | GSE2603 | B93.T | 77.4 | 0 | 0 | 0 | 0 |
| GSM50093 | GSE2603 | B97.T | 94.3 | 0 | 0 | 0 | 0 |
| GSM50094 | GSE2603 | B103.T | 38.6 | 1 | 1 | 1 | 1 |
| GSM50095 | GSE2603 | B108.T | 78.5 | 1 | 1 | 0 | 0 |
| GSM50096 | GSE2603 | B109.T | 16.6 | 1 | 0 | 1 | 0 |
| GSM50097 | GSE2603 | B111.T | 64.7 | 1 | 0 | 0 | 1 |
| GSM50098 | GSE2603 | B113.T | 30.8 | 1 | 0 | 0 | 1 |
| GSM50099 | GSE2603 | B81.T | 15.6 | 1 | 0 | 0 | 1 |
| GSM50100 | GSE2603 | B88.T | 69.7 | 0 | 0 | 0 | 0 |
| GSM50101 | GSE2603 | B92.T | 76.3 | 1 | 0 | 0 | 1 |
| GSM50102 | GSE2603 | B94.T | 8 | 0 | 0 | 0 | 0 |
| GSM50103 | GSE2603 | B95.T | 22.1 | 1 | 0 | 1 | 0 |
| GSM50104 | GSE2603 | B96.T | 81.2 | 1 | 0 | 0 | 1 |
| GSM50105 | GSE2603 | B99.T | 86.3 | 0 | 0 | 0 | 0 |
| GSM50106 | GSE2603 | B7.T | 19 | 1 | 0 | 1 | 0 |
| GSM50107 | GSE2603 | B10.T | 74.5 | 0 | 0 | 0 | 0 |
| GSM50108 | GSE2603 | B11.T | 47.5 | 0 | 0 | 0 | 0 |
| GSM50109 | #N/A | #N/A | #N/A | ## | #N/A | #### | #N/A |
| GSM50110 | GSE2603 | B13.T | 62.3 | 0 | 0 | 0 | 0 |
| GSM50111 | GSE2603 | B14.T | 87.6 | 0 | 0 | 0 | 0 |
| GSM50112 | GSE2603 | B15.T | 14.2 | 1 | 0 | 1 | 1 |
| GSM50113 | #N/A | #N/A | #N/A | ## | #N/A | #### | #N/A |
| GSM50114 | GSE2603 | B17.T | 15.6 | 1 | 0 | 0 | 1 |
| GSM50115 | GSE2603 | B18.T | 53 | 0 | 0 | 0 | 0 |
| GSM50116 | GSE2603 | B1.T | 43 | 0 | 0 | 0 | 0 |
| GSM50117 | #N/A | #N/A | #N/A | ## | #N/A | #### | #N/A |
| GSM50118 | GSE2603 | B24.T | 75.4 | 0 | 0 | 0 | 0 |
| GSM50119 | GSE2603 | B26.T | 50.2 | 0 | 0 | 0 | 0 |
| GSM50120 | GSE2603 | B27.T | 44.2 | 0 | 0 | 0 | 0 |
| GSM50121 | GSE2603 | B28.T | 49.4 | 0 | 0 | 0 | 0 |
| GSM50122 | GSE2603 | B29.T | 38.9 | 1 | 0 | 0 | 1 |
| GSM50123 | GSE2603 | B2.T | 46.8 | 0 | 0 | 0 | 0 |
| GSM50124 | #N/A | #N/A | #N/A | ## | #N/A | #### | #N/A |
| GSM50125 | #N/A | #N/A | #N/A | ## | #N/A | #### | #N/A |
| GSM50126 | #N/A | #N/A | #N/A | ## | #N/A | #### | #N/A |
| GSM50127 | GSE2603 | B3.T | 62.9 | 0 | 0 | 0 | 0 |
| GSM50128 | GSE2603 | B4.T | 27.6 | 0 | 0 | 0 | 0 |
| GSM50129 | #N/A | #N/A | #N/A | ## | #N/A | #### | #N/A |
| GSM50130 | GSE2603 | B6.T | 40.3 | 0 | 0 | 0 | 0 |
| GSM50131 | GSE2603 | B8.T | 55.1 | 1 | 0 | 0 | 1 |
| GSM50132 | #N/A | #N/A | #N/A | ## | #N/A | #### | #N/A |
| GSM120649 | GSE5327 | 76 | 136.1 | 0 | #N/A | 0 | #N/A |
| GSM120651 | GSE5327 | 123 | 88.33 | 0 | #N/A | 0 | #N/A |
| GSM120652 | GSE5327 | 401 | 12.23 | 1 | #N/A | 0 | #N/A |
| GSM120653 | GSE5327 | 120 | 95.97 | 0 | #N/A | 0 | #N/A |
| GSM120654 | GSE5327 | 131 | 97.31 | 0 | #N/A | 0 | #N/A |
| GSM120655 | GSE5327 | 243 | 10.1 | 1 | #N/A | 1 | #N/A |
| GSM120656 | GSE5327 | 245 | 22.49 | 1 | #N/A | 1 | #N/A |
| GSM120657 | GSE5327 | 632 | 61.08 | 0 | #N/A | 0 | #N/A |
| GSM120658 | GSE5327 | 746 | 122.7 | 0 | #N/A | 0 | #N/A |
| GSM120659 | GSE5327 | 755 | 105.1 | 0 | #N/A | 0 | #N/A |
| GSM120660 | GSE5327 | 812 | 116.5 | 0 | #N/A | 0 | #N/A |
| GSM120661 | GSE5327 | 838 | 86.56 | 0 | #N/A | 0 | #N/A |
| GSM120662 | GSE5327 | 872 | 68.75 | 1 | #N/A | 0 | #N/A |
| GSM120663 | GSE5327 | 248 | 28.95 | 1 | #N/A | 1 | #N/A |
| GSM120664 | GSE5327 | 282 | 83.18 | 0 | #N/A | 0 | #N/A |
| GSM120665 | GSE5327 | 929 | 156.5 | 0 | #N/A | 0 | #N/A |
| GSM120666 | GSE5327 | 941 | 87.48 | 0 | #N/A | 0 | #N/A |
| GSM120667 | GSE5327 | 1060 | 71.28 | 0 | #N/A | 0 | #N/A |
| GSM120668 | GSE5327 | 1222 | 7.18 | 1 | #N/A | 1 | #N/A |
| GSM120669 | GSE5327 | 1582 | 96.23 | 0 | #N/A | 0 | #N/A |
| GSM120670 | GSE5327 | 1487 | 70.56 | 0 | #N/A | 0 | #N/A |
| GSM120671 | GSE5327 | 1069 | 23.64 | 1 | #N/A | 1 | #N/A |
| GSM120672 | GSE5327 | 1412 | 127.7 | 0 | #N/A | 0 | #N/A |
| GSM120673 | GSE5327 | 1455 | 64.3 | 0 | #N/A | 0 | #N/A |
| GSM120674 | GSE5327 | 1482 | 86.33 | 0 | #N/A | 0 | #N/A |
| GSM120675 | GSE5327 | 1497 | 119.4 | 0 | #N/A | 0 | #N/A |
| GSM120676 | GSE5327 | 1501 | 73.7 | 0 | #N/A | 0 | #N/A |
| GSM120677 | GSE5327 | 1524 | 68.36 | 0 | #N/A | 0 | #N/A |
| GSM120678 | GSE5327 | 1416 | 106.4 | 0 | #N/A | 0 | #N/A |
| GSM120679 | GSE5327 | 1535 | 41.64 | 1 | #N/A | 0 | #N/A |
| GSM120680 | GSE5327 | 1563 | 103.3 | 0 | #N/A | 0 | #N/A |
| GSM120681 | GSE5327 | 1568 | 115 | 0 | #N/A | 0 | #N/A |
| GSM120682 | GSE5327 | 1571 | 76.33 | 0 | #N/A | 0 | #N/A |
| GSM120683 | GSE5327 | 1593 | 126.9 | 0 | #N/A | 0 | #N/A |
| GSM120684 | GSE5327 | 1622 | 131.1 | 0 | #N/A | 0 | #N/A |
| GSM120685 | GSE5327 | 1650 | 87.93 | 0 | #N/A | 0 | #N/A |
| GSM120686 | GSE5327 | 1661 | 80.85 | 0 | #N/A | 0 | #N/A |
| GSM120687 | GSE5327 | 1555 | 9.18 | 1 | #N/A | 0 | #N/A |
| GSM120688 | GSE5327 | 1589 | 130.1 | 0 | #N/A | 0 | #N/A |
| GSM120689 | GSE5327 | 854 | 60 | 0 | #N/A | 0 | #N/A |
| GSM120690 | GSE5327 | 1821 | 87.84 | 0 | #N/A | 0 | #N/A |
| GSM120691 | GSE5327 | 1828 | 102.8 | 0 | #N/A | 0 | #N/A |
| GSM120692 | GSE5327 | 1858 | 88.62 | 0 | #N/A | 0 | #N/A |
| GSM120693 | GSE5327 | 1853 | 62.62 | 0 | #N/A | 0 | #N/A |
| GSM120694 | GSE5327 | 1871 | 86.13 | 0 | #N/A | 0 | #N/A |
| GSM120695 | GSE5327 | 1938 | 89.87 | 0 | #N/A | 0 | #N/A |
| GSM120696 | GSE5327 | 1939 | 151.5 | 0 | #N/A | 0 | #N/A |
| GSM120697 | GSE5327 | 1949 | 111.4 | 0 | #N/A | 0 | #N/A |
| GSM120698 | GSE5327 | 1966 | 61.48 | 0 | #N/A | 0 | #N/A |
| GSM120699 | GSE5327 | 1967 | 79.74 | 0 | #N/A | 0 | #N/A |
| GSM120700 | GSE5327 | 1976 | 72.72 | 0 | #N/A | 0 | #N/A |
| GSM120701 | GSE5327 | 1978 | 68.98 | 0 | #N/A | 0 | #N/A |
| GSM120702 | GSE5327 | 2001 | 4.361 | 1 | #N/A | 1 | #N/A |
| GSM120703 | GSE5327 | 2007 | 91.21 | 0 | #N/A | 0 | #N/A |
| GSM120704 | GSE5327 | 2021 | 91.15 | 0 | #N/A | 0 | #N/A |
| GSM120705 | GSE5327 | 2025 | 82.92 | 0 | #N/A | 0 | #N/A |
| GSM120706 | GSE5327 | 2038 | 102.2 | 0 | #N/A | 0 | #N/A |
| GSM120707 | GSE5327 | 2024 | 21.61 | 1 | #N/A | 1 | #N/A |
| GSM308256 | GSE12276 | chemo1 | 3 | 1 | 0 | 0 | 1 |
| GSM308257 | GSE12276 | chemo2 | 25 | 1 | 0 | 0 | 1 |
| GSM308258 | GSE12276 | chemo3 | 23 | 1 | 0 | 0 | 0 |
| GSM308259 | GSE12276 | chemo4 | 13 | 1 | 0 | 0 | 1 |
| GSM308260 | GSE12276 | chemo5 | 20 | 1 | 0 | 0 | 1 |
| GSM308261 | GSE12276 | chemo6 | 18 | 1 | 1 | 1 | 0 |
| GSM308262 | GSE12276 | chemo7 | 30 | 1 | 0 | 1 | 1 |
| GSM308263 | GSE12276 | chemo8 | 69 | 1 | 0 | 0 | 0 |
| GSM308264 | GSE12276 | chemo9 | 37 | 0 | 0 | 0 | 0 |
| GSM308265 | GSE12276 | chemo10 | 23 | 1 | 0 | 0 | 1 |
| GSM308266 | GSE12276 | chemo11 | 3 | 1 | 0 | 0 | 1 |
| GSM308267 | GSE12276 | chemo12 | 17 | 1 | 0 | 0 | 1 |
| GSM308268 | GSE12276 | chemo13 | 38 | 1 | 0 | 1 | 1 |
| GSM308269 | GSE12276 | chemo14 | 8 | 1 | 0 | 1 | 0 |
| GSM308270 | GSE12276 | chemo15 | 7 | 1 | 0 | 0 | 0 |
| GSM308271 | GSE12276 | chemo16 | 29 | 0 | 0 | 0 | 0 |
| GSM308272 | GSE12276 | chemo17 | 14 | 1 | 0 | 0 | 1 |
| GSM308273 | GSE12276 | chemo18 | 19 | 1 | 0 | 1 | 0 |
| GSM308274 | GSE12276 | chemo19 | 29 | 0 | 0 | 0 | 0 |
| GSM308275 | GSE12276 | chemo20 | 7 | 1 | 0 | 0 | 1 |
| GSM308276 | GSE12276 | chemo21 | 16 | 1 | 0 | 1 | 1 |
| GSM308277 | GSE12276 | chemo22 | 22 | 1 | 0 | 0 | 0 |
| GSM308278 | GSE12276 | chemo23 | 20 | 1 | 0 | 0 | 0 |
| GSM308279 | GSE12276 | chemo24 | 20 | 1 | 0 | 1 | 1 |
| GSM308280 | GSE12276 | chemo25 | 16 | 1 | 1 | 0 | 0 |
| GSM308281 | GSE12276 | chemo26 | 5 | 1 | 0 | 0 | 0 |
| GSM308282 | GSE12276 | chemo27 | 10 | 1 | 0 | 0 | 1 |
| GSM308283 | GSE12276 | chemo28 | 13 | 1 | 0 | 0 | 0 |
| GSM308284 | GSE12276 | chemo29 | 46 | 1 | 0 | 0 | 0 |
| GSM308285 | GSE12276 | chemo30 | 7 | 1 | 0 | 0 | 0 |
| GSM308286 | GSE12276 | chemo31 | 11 | 1 | 0 | 1 | 0 |
| GSM308287 | GSE12276 | chemo32 | 42 | 1 | 0 | 0 | 1 |
| GSM308288 | GSE12276 | chemo33 | 10 | 1 | 0 | 0 | 0 |
| GSM308289 | GSE12276 | chemo34 | 61 | 1 | 0 | 0 | 1 |
| GSM308290 | GSE12276 | chemo35 | 6 | 1 | 0 | 0 | 1 |
| GSM308291 | GSE12276 | chemo36 | 25 | 1 | 1 | 1 | 0 |
| GSM308292 | GSE12276 | chemo37 | 99 | 1 | 0 | 0 | 1 |
| GSM308293 | GSE12276 | chemo38 | 5 | 1 | 0 | 0 | 0 |
| GSM308294 | GSE12276 | chemo39 | 21 | 1 | 0 | 1 | 1 |
| GSM308295 | GSE12276 | chemo40 | 11 | 1 | 0 | 1 | 0 |
| GSM308296 | GSE12276 | chemo41 | 32 | 0 | 0 | 0 | 0 |
| GSM308297 | GSE12276 | chemo42 | 14 | 1 | 0 | 0 | 1 |
| GSM308298 | GSE12276 | chemo43 | 14 | 1 | 0 | 0 | 1 |
| GSM308299 | GSE12276 | chemo44 | 18 | 1 | 1 | 0 | 0 |
| GSM308300 | GSE12276 | chemo45 | 29 | 1 | 0 | 0 | 1 |
| GSM308301 | GSE12276 | chemo46 | 15 | 0 | 0 | 0 | 0 |
| GSM308302 | GSE12276 | chemo47 | 24 | 1 | 0 | 1 | 0 |
| GSM308303 | GSE12276 | chemo48 | 39 | 1 | 1 | 0 | 0 |
| GSM308304 | GSE12276 | chemo49 | 54 | 1 | 0 | 0 | 0 |
| GSM308305 | GSE12276 | chemo50 | 15 | 1 | 0 | 0 | 1 |
| GSM308306 | GSE12276 | chemo51 | 28 | 1 | 0 | 1 | 0 |
| GSM308307 | GSE12276 | chemo52 | 29 | 1 | 1 | 1 | 0 |
| GSM308308 | GSE12276 | chemo53 | 23 | 1 | 0 | 0 | 1 |
| GSM308309 | GSE12276 | chemo54 | 20 | 1 | 0 | 0 | 1 |
| GSM308310 | GSE12276 | chemo55 | 36 | 0 | 0 | 0 | 0 |
| GSM308311 | GSE12276 | chemo56 | 36 | 1 | 0 | 0 | 1 |
| GSM308312 | GSE12276 | chemo57 | 115 | 0 | 0 | 0 | 0 |
| GSM308313 | GSE12276 | chemo58 | 4 | 1 | 0 | 1 | 0 |
| GSM308314 | GSE12276 | chemo59 | 8 | 1 | 0 | 1 | 0 |
| GSM308315 | GSE12276 | chemo60 | 60 | 1 | 0 | 1 | 1 |
| GSM308316 | GSE12276 | chemo61 | 0 | 1 | 1 | 1 | 1 |
| GSM308318 | GSE12276 | chemo62 | 42 | 1 | 0 | 1 | 0 |
| GSM308319 | GSE12276 | chemo63 | 15 | 1 | 0 | 1 | 1 |
| GSM308320 | GSE12276 | chemo64 | 7 | 1 | 0 | 0 | 0 |
| GSM308321 | GSE12276 | chemo65 | 0 | 1 | 0 | 0 | 1 |
| GSM308322 | GSE12276 | chemo66 | 27 | 1 | 0 | 0 | 1 |
| GSM308323 | GSE12276 | chemo67 | 18 | 1 | 0 | 1 | 1 |
| GSM308324 | GSE12276 | chemo68 | 14 | 1 | 0 | 1 | 1 |
| GSM308325 | GSE12276 | chemo69 | 13 | 1 | 0 | 0 | 0 |
| GSM308326 | GSE12276 | chemo70 | 19 | 1 | 1 | 0 | 0 |
| GSM308327 | GSE12276 | chemo71 | 73 | 0 | 0 | 0 | 0 |
| GSM308328 | GSE12276 | chemo72 | 16 | 1 | 0 | 1 | 0 |
| GSM308329 | GSE12276 | chemo73 | 1 | 0 | 0 | 0 | 0 |
| GSM308330 | GSE12276 | chemo74 | 0 | 1 | 0 | 0 | 1 |
| GSM308331 | GSE12276 | chemo75 | 0 | 1 | 0 | 1 | 1 |
| GSM308332 | GSE12276 | chemo76 | 38 | 1 | 0 | 0 | 0 |
| GSM308333 | GSE12276 | chemo77 | 18 | 1 | 0 | 1 | 0 |
| GSM308334 | GSE12276 | chemo78 | 23 | 0 | 0 | 0 | 0 |
| GSM308335 | GSE12276 | chemo79 | 50 | 1 | 0 | 0 | 0 |
| GSM308336 | GSE12276 | chemo80 | 8 | 1 | 0 | 0 | 0 |
| GSM308337 | GSE12276 | chemo81 | 39 | 0 | 0 | 0 | 0 |
| GSM308338 | GSE12276 | chemo82 | 10 | 1 | 0 | 1 | 0 |
| GSM308339 | GSE12276 | chemo83 | 3 | 1 | 0 | 1 | 0 |
| GSM308340 | GSE12276 | chemo84 | 60 | 1 | 0 | 1 | 1 |
| GSM308341 | GSE12276 | chemo85 | 17 | 0 | 0 | 0 | 0 |
| GSM308342 | GSE12276 | chemo86 | 23 | 1 | 0 | 0 | 0 |
| GSM308343 | GSE12276 | chemo87 | 12 | 1 | 0 | 0 | 1 |
| GSM308344 | GSE12276 | chemo88 | 6 | 1 | 0 | 0 | 1 |
| GSM308345 | GSE12276 | chemo89 | 30 | 1 | 0 | 0 | 0 |
| GSM308346 | GSE12276 | chemo90 | 13 | 1 | 0 | 1 | 0 |
| GSM308347 | GSE12276 | chemo91 | 6 | 1 | 0 | 0 | 1 |
| GSM308348 | GSE12276 | chemo92 | 25 | 1 | 0 | 0 | 1 |
| GSM308349 | GSE12276 | chemo93 | 4 | 1 | 0 | 0 | 1 |
| GSM308350 | GSE12276 | chemo94 | 15 | 1 | 0 | 0 | 1 |
| GSM308351 | GSE12276 | chemo95 | 30 | 0 | 0 | 0 | 0 |
| GSM308352 | GSE12276 | chemo96 | 0 | 1 | 0 | 0 | 1 |
| GSM308353 | GSE12276 | chemo97 | 64 | 0 | 0 | 0 | 0 |
| GSM308354 | GSE12276 | chemo98 | 21 | 1 | 0 | 0 | 1 |
| GSM308355 | GSE12276 | chemo99 | 0 | 1 | 0 | 0 | 0 |
| GSM308356 | GSE12276 | chemo100 | 18 | 1 | 0 | 1 | 0 |
| GSM308357 | GSE12276 | chemo101 | 16 | 0 | 0 | 0 | 0 |
| GSM308358 | GSE12276 | chemo102 | 0 | 1 | 0 | 0 | 1 |
| GSM308359 | GSE12276 | chemo103 | 36 | 1 | 0 | 0 | 0 |
| GSM308360 | GSE12276 | chemo104 | 39 | 1 | 0 | 0 | 0 |
| GSM308361 | GSE12276 | chemo105 | 27 | 1 | 0 | 1 | 0 |
| GSM308362 | GSE12276 | chemo106 | 15 | 1 | 0 | 0 | 1 |
| GSM308363 | GSE12276 | chemo107 | 22 | 1 | 0 | 0 | 1 |
| GSM308364 | GSE12276 | chemo108 | 29 | 1 | 0 | 0 | 1 |
| GSM308365 | GSE12276 | chemo109 | 11 | 1 | 0 | 0 | 0 |
| GSM308366 | GSE12276 | chemo110 | 58 | 1 | 1 | 0 | 0 |
| GSM308367 | GSE12276 | chemo111 | 40 | 1 | 0 | 0 | 1 |
| GSM308368 | GSE12276 | chemo112 | 48 | 1 | 0 | 0 | 1 |
| GSM308369 | GSE12276 | chemo113 | 38 | 1 | 0 | 0 | 1 |
| GSM308370 | GSE12276 | chemo114 | 12 | 1 | 1 | 0 | 0 |
| GSM308371 | GSE12276 | chemo115 | 13 | 1 | 0 | 0 | 1 |
| GSM308372 | GSE12276 | chemo116 | 85 | 1 | 1 | 0 | 0 |
| GSM308373 | GSE12276 | chemo117 | 9 | 1 | 0 | 0 | 0 |
| GSM308374 | GSE12276 | chemo118 | 6 | 1 | 1 | 0 | 0 |
| GSM308375 | GSE12276 | chemo119 | 28 | 1 | 0 | 0 | 1 |
| GSM308376 | GSE12276 | chemo120 | 6 | 1 | 0 | 0 | 0 |
| GSM308377 | GSE12276 | chemo121 | 19 | 1 | 0 | 0 | 0 |
| GSM308378 | GSE12276 | chemo122 | 15 | 1 | 0 | 1 | 0 |
| GSM308379 | #N/A | #N/A | #N/A | ## | #N/A | #### | #N/A |
| GSM308380 | GSE12276 | chemo124 | 7 | 0 | 0 | 0 | 0 |
| GSM308381 | GSE12276 | chemo125 | 115 | 1 | 0 | 0 | 0 |
| GSM308382 | GSE12276 | chemo126 | 46 | 1 | 0 | 0 | 1 |
| GSM308383 | GSE12276 | chemo127 | 9 | 1 | 0 | 0 | 1 |
| GSM308384 | GSE12276 | chemo128 | 32 | 1 | 0 | 0 | 1 |
| GSM308385 | GSE12276 | chemo129 | 27 | 1 | 0 | 0 | 1 |
| GSM308386 | GSE12276 | chemo130 | 5 | 1 | 0 | 0 | 0 |
| GSM308387 | GSE12276 | chemo131 | 4 | 1 | 0 | 0 | 0 |
| GSM308388 | GSE12276 | chemo132 | 17 | 0 | 0 | 0 | 0 |
| GSM308389 | GSE12276 | chemo133 | 15 | 1 | 0 | 0 | 1 |
| GSM308390 | #N/A | #N/A | #N/A | ## | #N/A | #### | #N/A |
| GSM308391 | GSE12276 | chemo135 | 7 | 1 | 0 | 1 | 0 |
| GSM308392 | #N/A | #N/A | #N/A | ## | #N/A | #### | #N/A |
| GSM308393 | GSE12276 | chemo137 | 33 | 1 | 0 | 1 | 1 |
| GSM308394 | GSE12276 | chemo138 | 22 | 1 | 0 | 1 | 0 |
| GSM308395 | #N/A | #N/A | #N/A | ## | #N/A | #### | #N/A |
| GSM308396 | #N/A | #N/A | #N/A | ## | #N/A | #### | #N/A |
| GSM308397 | #N/A | #N/A | #N/A | ## | #N/A | #### | #N/A |
| GSM308398 | GSE12276 | chemo142 | 12 | 1 | 0 | 0 | 0 |
| GSM308399 | GSE12276 | chemo143 | 38 | 1 | 0 | 0 | 1 |
| GSM308400 | #N/A | #N/A | #N/A | ## | #N/A | #### | #N/A |
| GSM308401 | GSE12276 | chemo145 | 13 | 1 | 0 | 0 | 1 |
| GSM308402 | #N/A | #N/A | #N/A | ## | #N/A | #### | #N/A |
| GSM308403 | #N/A | #N/A | #N/A | ## | #N/A | #### | #N/A |
| GSM308404 | GSE12276 | chemo148 | 8 | 1 | 0 | 0 | 1 |
| GSM308405 | #N/A | #N/A | #N/A | ## | #N/A | #### | #N/A |
| GSM308406 | GSE12276 | chemo150 | 58 | 0 | 0 | 0 | 0 |
| GSM308407 | GSE12276 | chemo151 | 94 | 1 | 0 | 0 | 0 |
| GSM308408 | GSE12276 | chemo152 | 4 | 1 | 0 | 0 | 1 |
| GSM308409 | GSE12276 | chemo153 | 0 | 0 | 0 | 0 | 0 |
| GSM308410 | GSE12276 | chemo154 | 38 | 1 | 0 | 0 | 1 |
| GSM308411 | #N/A | #N/A | #N/A | ## | #N/A | #### | #N/A |
| GSM308412 | #N/A | #N/A | #N/A | ## | #N/A | #### | #N/A |
| GSM308413 | GSE12276 | BV1 | 49 | 1 | 1 | 0 | 1 |
| GSM308414 | GSE12276 | BV2 | 97 | 1 | 0 | 0 | 1 |
| GSM308415 | GSE12276 | BV3 | 50 | 1 | 0 | 0 | 1 |
| GSM308416 | GSE12276 | BV4 | 53 | 1 | 0 | 0 | 1 |
| GSM308417 | GSE12276 | BV5 | 23 | 1 | 0 | 0 | 1 |
| GSM308418 | GSE12276 | BV6 | 25 | 1 | 0 | 0 | 1 |
| GSM308419 | GSE12276 | BV7 | 22 | 1 | 0 | 0 | 1 |
| GSM308420 | GSE12276 | BV8 | 36 | 1 | 0 | 0 | 1 |
| GSM308421 | GSE12276 | BV9 | 35 | 1 | 0 | 0 | 1 |
| GSM308422 | GSE12276 | BV10 | 16 | 1 | 0 | 0 | 1 |
| GSM308423 | GSE12276 | BV11 | 35 | 1 | 0 | 1 | 1 |
| GSM308424 | GSE12276 | BV12 | 23 | 1 | 0 | 0 | 1 |
| GSM308425 | GSE12276 | BV13 | 14 | 1 | 0 | 0 | 1 |
| GSM308426 | GSE12276 | BV14 | 9 | 1 | 0 | 0 | 1 |
| GSM308427 | GSE12276 | BV15 | 42 | 1 | 0 | 1 | 0 |
| GSM308428 | GSE12276 | BV16 | 17 | 1 | 0 | 0 | 1 |
| GSM308429 | GSE12276 | BV17 | 5 | 1 | 0 | 0 | 1 |
| GSM308430 | GSE12276 | BV18 | 55 | 1 | 0 | 1 | 0 |
| GSM308431 | GSE12276 | BV19 | 23 | 1 | 0 | 0 | 1 |
| GSM308432 | GSE12276 | BV20 | 40 | 1 | 0 | 0 | 1 |
| GSM308433 | GSE12276 | BV21 | 44 | 1 | 0 | 0 | 1 |
| GSM308434 | GSE12276 | BV22 | 47 | 1 | 0 | 0 | 0 |
| GSM308435 | GSE12276 | BV23 | 26 | 1 | 0 | 0 | 0 |
| GSM308436 | GSE12276 | BV24 | 21 | 1 | 0 | 0 | 1 |
| GSM308437 | GSE12276 | BV25 | 35 | 1 | 0 | 0 | 1 |
| GSM308438 | GSE12276 | BV26 | 35 | 1 | 0 | 0 | 1 |
| GSM308439 | GSE12276 | BV27 | 4 | 1 | 0 | 0 | 1 |
| GSM308440 | GSE12276 | BV28 | 5 | 1 | 0 | 0 | 0 |
| GSM308441 | GSE12276 | BV29 | 42 | 1 | 0 | 0 | 1 |
| GSM308442 | GSE12276 | BV30 | 18 | 1 | 0 | 0 | 0 |
| GSM308443 | GSE12276 | BV31 | 14 | 1 | 0 | 0 | 0 |
| GSM308444 | GSE12276 | BV32 | 16 | 1 | 0 | 0 | 1 |
| GSM308445 | GSE12276 | BV33 | 30 | 1 | 0 | 0 | 1 |
| GSM308446 | GSE12276 | BV34 | 42 | 1 | 0 | 0 | 1 |
| GSM308447 | GSE12276 | BV35 | 24 | 1 | 0 | 0 | 1 |
| GSM308448 | GSE12276 | BV36 | 25 | 1 | 0 | 0 | 1 |
| GSM308449 | GSE12276 | BV37 | 47 | 1 | 0 | 1 | 0 |
| GSM308450 | GSE12276 | BV38 | 33 | 1 | 0 | 0 | 1 |
| GSM308451 | GSE12276 | BV39 | 29 | 1 | 0 | 0 | 1 |
| GSM308452 | GSE12276 | BV40 | 25 | 1 | 0 | 1 | 1 |
| GSM308453 | GSE12276 | BV41 | 83 | 1 | 0 | 0 | 1 |
| GSM308454 | GSE12276 | BV42 | 73 | 1 | 0 | 0 | 1 |
| GSM308455 | GSE12276 | BV43 | 31 | 1 | 0 | 0 | 1 |
| GSM308456 | GSE12276 | BV44 | 28 | 1 | 0 | 0 | 0 |
| GSM308457 | GSE12276 | BV45 | 18 | 1 | 0 | 0 | 1 |
| GSM308458 | GSE12276 | BV46 | 9 | 1 | 0 | 0 | 1 |
| GSM308459 | GSE12276 | BV47 | 7 | 1 | 0 | 0 | 0 |
| GSM308460 | GSE12276 | BV48 | 107 | 1 | 0 | 0 | 1 |
| GSM352098 | GSE14020 | 104406 | 24 | 1 | 1 | 0 | 0 |
| GSM352100 | GSE14020 | 105079 | 0 | 1 | 0 | 0 | 1 |
| GSM352101 | GSE14020 | 107502 | 37 | 1 | 1 | 0 | 0 |
| GSM352103 | GSE14020 | 107696 | 31 | 1 | 0 | 0 | 1 |
| GSM352105 | GSE14020 | 107961 | 31 | 1 | 0 | 0 | 1 |
| GSM352107 | #N/A | #N/A | #N/A | ## | #N/A | #### | #N/A |
| GSM352109 | #N/A | #N/A | #N/A | ## | #N/A | #### | #N/A |
| GSM352110 | #N/A | #N/A | #N/A | ## | #N/A | #### | #N/A |
| GSM352111 | GSE14020 | 110032 | 97 | 1 | 1 | 0 | 0 |
| GSM352113 | GSE14020 | 110312 | 26 | 1 | 1 | 0 | 0 |
| GSM352114 | GSE14020 | 110783 | 56 | 1 | 0 | 1 | 0 |
| GSM352115 | GSE14020 | 111276 | 48 | 1 | 1 | 0 | 0 |
| GSM352117 | GSE14020 | 112282 | 74 | 1 | 0 | 0 | 1 |
| GSM352119 | GSE14020 | 112397 | 114 | 1 | 0 | 0 | 1 |
| GSM352120 | GSE14020 | 112403 | 38 | 1 | 1 | 0 | 0 |
| GSM352121 | GSE14020 | 113471 | 172 | 1 | 1 | 0 | 0 |
| GSM352122 | GSE14020 | 113542 | 2 | 1 | 1 | 0 | 0 |
| GSM352123 | GSE14020 | 114112 | 0 | 1 | 0 | 0 | 1 |
| GSM352124 | GSE14020 | 115463 | 33 | 1 | 0 | 0 | 1 |
| GSM352125 | GSE14020 | 116610 | 23 | 1 | 1 | 0 | 0 |
| GSM352126 | #N/A | #N/A | #N/A | ## | #N/A | #### | #N/A |
| GSM352127 | GSE14020 | 11993 | NA | 1 | 0 | 1 | 0 |
| GSM352128 | GSE14020 | 12370 | 46 | 1 | 1 | 0 | 0 |
| GSM352129 | GSE14020 | 13685 | 60 | 1 | 1 | 0 | 0 |
| GSM352130 | GSE14020 | 14568 | 31 | 1 | 1 | 0 | 0 |
| GSM352131 | #N/A | #N/A | #N/A | ## | #N/A | #### | #N/A |
| GSM352132 | #N/A | #N/A | #N/A | ## | #N/A | #### | #N/A |

**Supplementary Table S3: Summary of enriched pathways in patients with or without brain metastases.**

|  | **Pathways** | **Normalized Enrichment Score(NES)** | **GSEA p-value** | **GSEA FDR q-value** | **Brain Metastasis free survival p-value** |
| --- | --- | --- | --- | --- | --- |
| **Enriched in Brain Met** | **MET** | **1.92** | **0.005** | **0.006** | **0.0042** |
| **E2F3** | **1.41** | **0.034** | **0.37** | **0.42** |
| **EZH2** | **1.39** | **0.015** | **0.34** | **0.02** |
| **ATF2** | **1.34** | **0.009** | **0.39** | **0.73** |
| **Enriched in Met free** | **SMAD7** | **1.69** | **0.003** | **0.03** | **0.29** |
| **MAX** | **1.66** | **0.004** | **0.06** | **0.46** |
| **p16** | **1.56** | **0.003** | **0.08** | **0.87** |
| **FOXC1** | **1.43** | **0.017** | **0.09** | **0.26** |

**Supplementary Table S4: GSEA results of natural compounds which are associated with brain metastasis status.**

| **Natural compound** | **Normalized Enrichment Score(NES)** | **p-value** |
| --- | --- | --- |
| **Resveratrol** | **1.65** | **0.013** |
| **Berberine** | **1.45** | **0.06** |
| **Genistein** | **0.96** | **0.51** |
| **Curcumin** | **0.93** | **0.54** |
|  |  |  |

**Supplementary Table S5: Fold change of top down regulated adhesion genes between two groups that with or without knock down of c-Met by doxycycline.**

|  | 231BrM/Dox/sh-c-Met | SKBrM3/Dox/sh-c-Met |
| --- | --- | --- |
|  | FC(-Dox Vs +Dox) | FC(-Dox Vs +Dox) |
| ICAM1 | 6.14 | 4.16 |
| CDH11 | 4.16 | 3.72 |
| CLDN1 | 3.94 | 4.82 |
| CTNNB1 | 7.24 | 4.77 |
| ITGAV | 3.06 | 2.76 |
| ITGA3 | 1.84 | 3.82 |
| ITGA9 | 2.62 | 3.94 |
| ITGA5 | 2.06 | 2.5 |
| ITGB1 | 2.62 | 3.5 |
| ITGB3 | 2.62 | 2.5 |
| ITGB4 | 1.84 | 2.06 |
| LICAM | 1.35 | 0.98 |
| VCAM1 | 1.2 | 1.33 |
